# Supplementary material
Source: PubMed Central journal article supplement (PMC3738004)
Supplement: NIHMS501442-supplement-S_Figure_1.pdf [file NIHMS501442-supplement-S_Figure_1.pdf]

CD14

↑  
monocytes

Comp-Ostt655-A: CD14

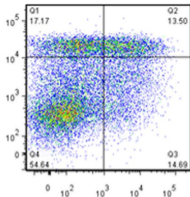

Comp-Ostt655-A: CD14

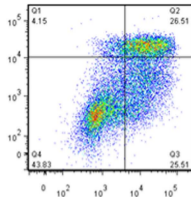

CD11c

↑  
mDC

Comp-PerCP-Cy5-5-A: CD11c

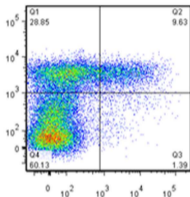

IL-1β

CD303

↑  
pDC

Comp-PE-A: CD303

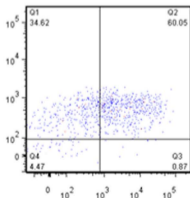

Comp-PE-A: CD303

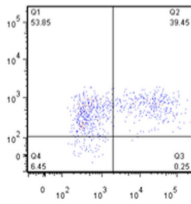

TNFα

IFNα
